# Supplementary material
Source: publisher figshare collection journal article supplement (https://sage.figshare.com/ndownloader/files/18716042)
Supplement: Supplementary file 1 [file 18716042]

## Supplemental Online Material

### *Stimuli*

*Race: White vs. Black Male Faces.* In the categorization and the conformity task, photos of 20 black and 20 white male faces were used. These photos were selected on the basis of a pre-test in which participants saw 64 male faces (half of which of white-Caucasian) with neutral facial expression (downloaded from on-line databases, Minear & Park, 2004; Payne, 2001; Tarrés & Rama), after they were cropped for showing only the central features and equally resized (275 X 395 pixels). The 20 photos of white and the photos of 20 black faces used in the experiment were evaluated on average as equally pleasant (on a five-points scale, 1 = not at all; 5 = completely) ( $M_{\text{white}} = 2.32$ ,  $SD = .44$ ;  $M_{\text{black}} = 2.31$ ,  $SD = .48$ )  $t(20) = .10$ ,  $p = .92$ , although the firsts were judged (on a five-points scale, 1 = certainly Italian; 5 = certainly foreigner) as more likely Italian ( $M = 2.52$ ,  $SD = .41$ ) whereas the latter as foreigner ( $M = 4.50$ ,  $SD = .60$ ),  $t(20) = 10.54$   $p < .001$ .

*Accent: native vs. nonnative Italian.* In the categorization and in the conformity task, 10 voices speaking with a native Italian and 10 with a non-native Italian accent pronouncing two phrases each – were used. The selection process was as it follows. We contacted 19 Italian native and 14 non-native Italian speakers (all males, mainly from West Africa) and gained consented from them to be audio-registered while reading 6 short phrases. All the obtained audio-clips were then edited by Audacity® software (cut so as the phrase started immediately, noises were filtered and volume normalized) and then presented to 10 participants (5 female, age  $M = 21.50$ ,  $SD = 1.08$ ) in a pre-test conducted in one of our university lab. Participants listened to the audio-clips and - in a first task - indicated whether the speaker was Italian vs. Foreigner, by pressing D or K (counterbalanced across participants) on a QWERTY keyboard. Participants were asked to be accurate but also fast and therefore not to wait until the end of the phrase to respond. This task was implemented using Inquisit Milliseconds® software. Each speaker was pronouncing 6 different short phrases each. In a second task, participants rated voice' pleasantness while pronouncing a phrase with no relational

content ("Scusa, che ore sono?/Excuse me, what's time is it?"), (from 1 = not at all to 5 = completely). For each speaker, we selected two phrases (1: "Andiamo a bere un caffè/let's have some coffee"; 2. "Piacere di conoscerti/nice to meet you") that could be used in a positive social interaction. Categorization and reaction time responses for these phrases were separately entered in a 2 (Accent: native vs. non-native) X 2 (Phrase: 1 vs. 2) within-subjects ANOVA. The (10) native and (10) non-native speakers were correctly recognized as native ( $M = 90.00\%$ ,  $SD = 10.27$ ) or non-native Italian ( $M = 88.61\%$ ,  $SD = 9.44$ ),  $p = .70$  (all other effects  $p > .15$ ) and with the same speed ( $M_{\text{nat}} = 1026.86$  ms,  $SD = 152.56$ ) ( $M_{\text{non-nat}} = 1035.80$ ,  $SD = 166.79$ ),  $p = .80$  (all other effects  $p > .32$ ). Moreover, the 10 native ( $M = 3.03$ ,  $SD = 0.60$ ) and 10 non-native speakers pleasantness ( $M = 2.62$ ,  $SD = 0.58$ ) did not differ from a medium point (3),  $t(9) = .16$ ,  $p = .88$  and  $t(9) = -2.08$ ,  $p = .07$  respectively. Finally, on an independent pre-test ( $N = 23$ , 12 females, average age = 31.57,  $SD = 3.40$ ), the two phrases were judged as equally positive (on five-points scale, 1 = completely negative, 5 = completely positive),  $M = 5.30$ ,  $SD = 1.15$ ;  $M = 5.30$ ,  $SD = .88$ , respectively,  $t(22) = .00$ ,  $p = \text{n.s.}$

### ***Questionnaire Scale.***

*Language and race centrality in the conception of national identity.* Based on Sloman and colleagues (1998) work, we assessed centrality with 5 items for language and 5 for race (i.e. How surprised would you be to encounter...; How easily can you imagine...; How representative is...; How similar to the typical Italian is... an Italian who does not speak Italian/is not white?; What percentage of Italians speak Italian/is white? 1= less than 10%; 7 = 100%).

*Social identification.* Participants rated their identification to the national ingroup (i.e. To what extent do you feel part of the Italian group? Postmes, Haslam, & Jans, 2012) and their self-investment in this group (3 items, to what extent ...do you like to be Italian? ...do you feel a bond with Italians? .. being Italian is an important part of your identity?; Leach, et al. 2008). An additional item directly tapped whether language played a central role in their own ingroup

identification (i.e. To what extent is speaking Italian an important part of your Italian identity?).

Responses were registered on a 5-points scale (1 = not at all to 5 = completely).

The questionnaire included other questions among which a self-categorization pictorial item and an Inclusion of the other in the self pictorial scale on which participants rated the closeness to the first generation Italian they know the best. Given that the results for these questions were similar to those obtained for similar measures, these results were not reported.

### **Analysis including Study as factor: Results**

Preliminary analyses were conducted including Study (1a vs.1b) as a between-participants factor in the Race X Accent ANOVA. For the outcome of the categorization, the Study factor was involved only in a marginal three way interaction,  $F(1, 100) = 3.75, p = .06, \eta^2_p = .04$ . Importantly, the Race X Accent ANOVA conducted separately for Study 1 and Study 2 yielded a similar pattern of results. (Main effect of Accent: Study 1a -  $F(1, 41) = 506.49, p < .001, \eta^2_p = .92$ , Study 1b -  $F(1, 58) = 410.81, p < .001, \eta^2_p = .88$ ; Main effect of Race: Study. 1a -  $F(1, 41) = 33.22, p < .001, \eta^2_p = .44$ , Study 1b -  $F(1, 58) = 72.54, p < .001, \eta^2_p = .56$ ; Interaction effect Study 1a -  $F(1, 41) = 12.46, p = .001, \eta^2_p = .23$ ; Study 1b -  $F(1, 58) = 42.70, p < .001, \eta^2_p = .42$ ; in both studies all comparisons  $ps < .001$ ). Means are shown in Table 1.

For the categorization process, we found a Study marginal main effect on initial RT,  $F(1, 75) = 3.38, p = .07, \eta^2_p = .04$ , on RT,  $F(1, 75) = 18.26, p < .001, \eta^2_p = .20$ , and MD time,  $F(1, 75) = 21.72, p < .001, \eta^2_p = .23$ . In general, participants were faster in starting the response movement in Study 1a ( $M = 225$  ms,  $SD = 157$ ) than 1b ( $M = 163$  ms,  $SD = 138$ ), but the reverse occurred in giving the final answer (1a:  $M = 1300$  ms,  $SD = 216$ ; 1b:  $M = 1529$  ms,  $SD = 248$ ). Also, the MD was reached earlier in Study 1a ( $M = 652$  ms,  $SD = 127$ ) than in Study 1b ( $M = 811$  ms,  $SD = 166$ ).

For the MD, the analyses yielded a significant main effect of the Study factor,  $F(1, 75) = 7.15, p = .009, \eta^2_p = .09$ , Race X Accent interaction,  $F(1, 75) = 62.23, p < .001, \eta^2_p = .45$ , and a three-way interaction,  $F(1, 75) = 7.29, p = .009, \eta^2_p = .09$ . Importantly, in both studies, when analyzed separately, the Race X Accent interaction effect was significant (Exp. 1a:  $F(1, 34) = 54.52, p < .001, \eta^2_p = .62$ ; Exp. 1b:  $F(1, 41) = 14.14, p = .001, \eta^2_p = .26$ ). In Study 1a, all comparisons were significant, all  $ps < .001$ . In Study 1b, all comparisons were significant,  $ps < .007$ , with the exception of the comparison between White-Native and White-Nonnative that was marginally significant,  $p = .08$  (see Table 1).

**Table 1.** Means and standard deviation (in brackets) for categorization as an ingroup member (Italian), and maximum deviation (MD) in function of the target accent and race in Study 1a and 1b, separately.

|                |       | Accent    |           |           |           |
|----------------|-------|-----------|-----------|-----------|-----------|
|                |       | Native    |           | Nonnative |           |
|                | Race  | Exp. 1a   | Exp. 1b   | Exp. 1a   | Exp. 1b   |
| Categorization | White | 95% (7)   | 95% (11)  | 18% (19)  | 18% (17)  |
|                | Black | 67% (31)  | 56% (36)  | 4% (7)    | 4% (8)    |
| MD             | White | .47 (.31) | .41 (.26) | .70 (.34) | .52 (.30) |
|                | Black | .84 (.44) | .57 (.37) | .41 (.28) | .35 (.26) |

*Note.* Means within the same column, and within the same line are different from each other for  $p < .05$ . Black-native and White-native targets: MD for response “Italian”. Black-nonnative and White-nonnative targets: MD for response “foreigner”.

### RT and MD: ANOVA and correlations (N = 90)

For the RT and the MD responses, we focused the analysis on the response “Italian” for black-native accent and white-native accent trials, and for the response “Foreigner” for black-non native accent and white-non native accent trials. Twelve participants responded “Italian” (i.e., ingroup

member) to none of the 10 black-native accent trials; therefore they provided no data to be analyzed. Of the remaining 90 participants, 4 responded “Italian” just to 1 black-native accent trials, 6 participants 2 trials, and 3 participants 3 trials, the rest ( $N = 77$ ) answered “Italian” to at least 4 or more black-native accent trials. Given that RT and MD calculated on one or few trials risks to provide an unreliable index for the variable of interest, we decide to focus our analysis only on participants who gave at least 40% (4 out of 10 trials) of answers according to the target’s accent (i.e., the response “Italian” for Black-Native accent and White-Native accent trials and “Foreigner” for Black-Nonnative accent and White-Nonnative accent trials); the RT and MD indices were calculated on the responses to, at least, 4 trials. The choice of “4 trials” was a sort of compromise to not to consider in the analysis scores based on few trials and on the other hand not to exclude too many participants. In the main text we reported the results applying this restrictive criteria so to avoid the criticism that the results were influenced by an index based on few trials.

For completeness, we report here the analysis (ANOVA and correlation) conducted on 90 participants, that is all participants who provided at least 1 ingroup response to a black-native accent trial.

### **ANOVA**

For the initial RT, we only found a main effect of Race,  $F(1, 89) = 9.29, p = .003, \eta^2_p = .10$ , showing that the participants were slower in starting the response when they saw a Black ( $M = 190$  ms,  $SD = 158$ ) in comparison to a White face ( $M = 174$ , ms,  $SD = 145$ ). All other  $ps > .92$ . From the analysis of the final RTs, a significant interaction emerged,  $F(1, 89) = 113.96, p < .001, \eta^2_p = .56$ , showing a longer RT in the categorization of targets with mixed cues compared to those with convergent (in terms of categorization) cues (all  $ps < .001$ ) (means are reported in Table 2). For the MD, the ANOVA yielded a significant main effect of Race,  $F(1, 89) = 6.40, p = .01, \eta^2_p = .07$ , qualified by the significant interaction,  $F(1, 89) = 67.24, p < .001, \eta^2_p = .43$ . All comparisons between the means (Tab.2) were significant,  $p < .001$ . Additional comparison between mixed cue

targets (i.e. Black- Native accent and White-Nonnative accent) put in evidence that the MD, although generally high, were higher when categorizing Black faces with a native accent than White faces with a non-native accent,  $t(89) = 2.43, p = .02$ . The same comparison for cue convergent trials (i.e. Black- Non Native accent and White-Native accent) showed that the MD were somehow lower for Black-faces with a nonnative accent than White-faces with a native accent,  $t(89) = 1.86, p = .07$ .

Analyzing the MD time we found an interaction effect,  $F(1, 89) = 80.48, p < .001, \eta^2_p = .48$ . Conflict between the activated categories was solved faster in the case of cue congruent than mixed cues trials,  $p < .001$ . Further comparison yield no statistical significant difference neither between mixed trials,  $t(89) = .06, p = .96$ , nor between congruent trials  $t(89) = .63, p = .53$ .

**Table 2.** Means and standard deviation (in brackets) for reaction time (RT), maximum deviation (MD) and maximum deviation time (MD Time) in function of the target accent and race.

|         |       | Accent        |               |
|---------|-------|---------------|---------------|
|         |       | Native        | Non-native    |
| Race    |       |               |               |
| RT      | White | 1341 ms (260) | 1507 ms (310) |
|         | Black | 1484 ms (275) | 1371 ms (311) |
| MD      | White | .44 (.29)     | .60 (.33)     |
|         | Black | .69 (.42)     | .37 (.27)     |
| MD time | White | 688 ms (180)  | 787 ms (192)  |
|         | Black | 786 ms (200)  | 679 ms (204)  |

*Note.* Means within the same column, and within the same line are different from each other. Black-native and white-native targets: RT and MD for response “Italian”. Black-non native and white-non native targets: RT and MD for response “Foreigner”.

Correlations for the full sample are reported in Table 3. A larger MD—a greater parallel activation of in-group and out-group categories—for Black-Native accent targets was positively linked with the diagnosticity of ethnic appearance (i.e., being White) and the prejudice toward

immigrants and negatively related to the importance attributed to contact with first-generation Italians. Note that this last effect was in this sample only marginal significant.

To conclude, the analyses conducted on the full (N = 90) and the restricted sample (N = 77) yielded similar results except for the negative correlation between larger MD and importance attributed to the personal experiences with first-generation Italians that in the latter was significant and the first marginal significant.

**Table 3.** Bivariate correlations between MD and questionnaire measures (N = 85-90). MD was computed on the accent-based responses (“Italian” for black-native accent and white-native accent targets, and the RT for the response “Foreigner” for black-non native accent and white- non native accent targets).

|                                              | White-native<br>accent | Black-native<br>accent | White-non<br>native accent | Black-non<br>native accent |
|----------------------------------------------|------------------------|------------------------|----------------------------|----------------------------|
| 1. Social identification                     | .02                    | .02                    | -.06                       | -.07                       |
| 2. Language role in social<br>identification | -.07                   | -.14                   | -.11                       | -.05                       |
| 3. Language centrality                       | .11                    | .02                    | .08                        | .08                        |
| 4. Language diagnosticity                    | -.04                   | .08                    | .02                        | -.08                       |
| 5. Language importance                       | .01                    | -.12                   | -.10                       | .003                       |
| 6. Ethnic appearance centrality              | .05                    | .07                    | .08                        | .07                        |
| 7. Ethnic appearance<br>diagnosticity        | .12                    | .20*                   | .15                        | .09                        |
| 8. Ethnic appearance importance              | .02                    | .01                    | .09                        | .05                        |
| 9. Prejudice                                 | .27**                  | .23*                   | .21*                       | .02                        |
| 10. Social dominance orientation             | .09                    | .06                    | .21*                       | .20 ††                     |
| 11. Frequency of contact                     | .003                   | -.08                   | .02                        | -.02                       |
| 12. Importance of contact                    | -.07                   | -.20†                  | -.14                       | -.21 ††                    |

†  $p = .07$ , ††  $p = .06$ ,  $p < .05$ , \*\*  $p < .01$ , \*\*\*  $p < .001$

## References

- Leach, C. W., Van Zomeren, M., Zebel, S., Vliek, M. L., Pennekamp, S. F., Doosje, B., W. Ouwerkerk, & Spears, R. (2008). Group-level self-definition and self-investment: a hierarchical (multicomponent) model of in-group identification. *Journal of Personality and Social Psychology*, 95, 144 – 165. <http://dx.doi.org/10.1037/0022-3514.95.1.144>
- Miner, M., & Park, D. C. (2004). A lifespan database of adult facial stimuli. *Behavior Research Methods, Instruments, and Computers*, 36, 630-633. <http://dx.doi.org/10.3758/BF03206543>
- Payne, B. K. (2001). Prejudice and perception: The role of automatic and controlled processes in misperceiving a weapon. *Journal of Personality and Social Psychology*, 81, 181. <http://dx.doi.org/10.1037/0022-3514.81.2.181>
- Postmes, T., Haslam, S. A., & Jans, L. (2013). A single item measure of social identification: Reliability, validity, and utility. *British Journal of Social Psychology*, 52, 597-617. <https://doi.org/10.1111/bjso.12006>
- Sloman, S. A., Love, B. C., & Ahn, W. K. (1998). Feature centrality and conceptual coherence. *Cognitive Science*, 22, 189-228. [https://doi.org/10.1207/s15516709cog2202\\_2](https://doi.org/10.1207/s15516709cog2202_2)
- Tarrés, F. & Rama A. *GTAV Face Database*. <http://gps-tsc.upc.es/GTAV/ResearchAreas/UPCFaceDatabase/GTAVFaceDatabase.htm>
